# Supplementary material
Source: MDPI journal article supplement (https://www.mdpi.com/2071-1050/13/16/9051)
Supplement: s1 [file s1]

**Supplementary Table S1.** Total number of genera and species reported in scientific studies focused on bee biodiversity in Mexico from January 2001–October 2020.

| Genus ID | Genus                 | Species | Morphospecies* | Reference                 |
|----------|-----------------------|---------|----------------|---------------------------|
| 1        | <i>Agapostemon</i>    | 8       | 7              | [17-29]                   |
| 2        | <i>Ancyloscelis</i>   | 2       | 7              | [18-21,23,24,27,29,30]    |
| 3        | <i>Andrena</i>        | 12      | 19             | [19,23,25-31]             |
| 4        | <i>Anthidiellum</i>   | 5       | 2              | [18-24,26-29,32,36]       |
| 5        | <i>Anthidium</i>      | 4       | 2              | [19,25,27,28,33]          |
| 6        | <i>Anthodioctes</i>   | 2       | 1              | [19-21,24,26,27]          |
| 7        | <i>Anthophora</i>     | 7       | 3              | [19,23-25,27,28,30,31,36] |
| 8        | <i>Anthophorula</i>   | 5       | 0              | [19,27,28,30]             |
| 9        | <i>Apis</i>           | 1       | 0              | [24,26-29,31,34,35]       |
| 10       | <i>Ashmeadiella</i>   | 6       | 18             | [18-23,27,28,30,36]       |
| 11       | <i>Atoposmia</i>      | 1       | 0              | [19]                      |
| 12       | <i>Augochlora</i>     | 9       | 60             | [18-30,32,33,35,36]       |
| 13       | <i>Augochlorella</i>  | 5       | 10             | [18-23,26-28,30,32,33,36] |
| 14       | <i>Augochloropsis</i> | 4       | 12             | [18-30,32,36]             |
| 15       | <i>Austrostelis</i>   | 0       | 1              | [26]                      |
| 16       | <i>Aztecanthidium</i> | 1       | 0              | [27]                      |
| 17       | <i>Bombus</i>         | 11      | 2              | [19,24-28,30,31,33]       |
| 18       | <i>Caenaugochlora</i> | 7       | 17             | [18,19,21,23-27,29,32,36] |
| 19       | <i>Calliopsis</i>     | 7       | 6              | [18-23,26,28-30,36]       |
| 20       | <i>Caupolicana</i>    | 1       | 1              | [19,28]                   |
| 21       | <i>Centris</i>        | 26      | 12             | [19-24,26-32,36]          |
| 22       | <i>Cephalotrigona</i> | 2       | 0              | [18,20-23,26,32,36,37]    |
| 23       | <i>Ceratina</i>       | 9       | 68             | [18-30,32,35,36]          |
| 24       | <i>Chilicola</i>      | 3       | 1              | [26,28]                   |
| 25       | <i>Coelioxoides</i>   | 1       | 0              | [20,23,26]                |
| 26       | <i>Coelioxys</i>      | 15      | 20             | [19-24,26-29,32,36]       |
| 27       | <i>Colletes</i>       | 12      | 28             | [18-32,36]                |
| 28       | <i>Crawfordapis</i>   | 1       | 1              | [19,24]                   |
| 29       | <i>Deltoptila</i>     | 2       | 6              | [19,25,27,28]             |
| 30       | <i>Diadasia</i>       | 6       | 13             | [19-21,27,28,30]          |
| 31       | <i>Dianthidium</i>    | 6       | 4              | [19,27,28,30]             |
| 32       | <i>Dufourea</i>       | 1       | 0              | [28]                      |
| 33       | <i>Epanthidium</i>    | 1       | 0              | [32]                      |
| 34       | <i>Epeolus</i>        | 1       | 6              | [19-21,23,26,28,30,36]    |
| 35       | <i>Epicharis</i>      | 3       | 0              | [20,23,24,27,36]          |
| 36       | <i>Ericrosis</i>      | 1       | 0              | [19]                      |
| 37       | <i>Eucera</i>         | 0       | 1              | [19]                      |
| 38       | <i>Eufriesea</i>      | 6       | 0              | [21-24,26,27,32,36]       |
| 39       | <i>Euglossa</i>       | 9       | 3              | [18-24,26,27,29,32,36]    |
| 40       | <i>Eulaema</i>        | 3       | 0              | [18-27,32,36]             |
| 41       | <i>Exaerete</i>       | 3       | 1              | [20,21,23,24,30,32]       |
| 42       | <i>Exomalopsis</i>    | 9       | 28             | [18-23,25,26,28-30,32,36] |
| 43       | <i>Florilegus</i>     | 1       | 0              | [20,21,29,36]             |
| 44       | <i>Frieseomelitta</i> | 1       | 0              | [18,20-23,27,32,35,36-41] |
| 45       | <i>Gaesischia</i>     | 1       | 0              | [19,21,23,29,32]          |
| 46       | <i>Geotrigona</i>     | 1       | 0              | [37-39,41]                |
| 47       | <i>Habralictus</i>    | 1       | 0              | [24,27]                   |
| 48       | <i>Habropoda</i>      | 1       | 1              | [19,28]                   |
| 49       | <i>Halictus</i>       | 3       | 3              | [18-21,23,24,26-33,36]    |
| 50       | <i>Heriades</i>       | 4       | 10             | [18-23,25-27,30,32,33,36] |
| 51       | <i>Hesperapis</i>     | 0       | 2              | [19,31]                   |

|     |                        |    |     |                                       |
|-----|------------------------|----|-----|---------------------------------------|
| 52  | <i>Holcopasites</i>    | 0  | 1   | [19]                                  |
| 53  | <i>Hoplostelis</i>     | 1  | 0   | [27]                                  |
| 54  | <i>Hylaeus</i>         | 0  | 37  | [18-23,25-28,30,32,35,36]             |
| 55  | <i>Hypanthidioides</i> | 1  | 0   | [26]                                  |
| 56  | <i>Hypanthidium</i>    | 3  | 2   | [18,20-24,26,29,32,36]                |
| 57  | <i>Lasioglossum</i>    | 20 | 156 | [18-33,35,36]                         |
| 58  | <i>Leiopodus</i>       | 1  | 0   | [30]                                  |
| 59  | <i>Lestrimelitta</i>   | 2  | 0   | [21,24,35,37-41]                      |
| 60  | <i>Lithurgopsis</i>    | 4  | 5   | [19,20,27,28,30]                      |
| 61  | <i>Macrotera</i>       | 5  | 12  | [19,28,30]                            |
| 62  | <i>Megachile</i>       | 47 | 84  | [18-33,35,36]                         |
| 63  | <i>Megalopta</i>       | 1  | 0   | [24]                                  |
| 64  | <i>Megandrena</i>      | 0  | 1   | [31]                                  |
| 65  | <i>Melipona**</i>      | 6  | 0   | [18,20,23,24,26,32,34,36-39,41,42]    |
| 66  | <i>Melissodes</i>      | 11 | 30  | [18-30,32,36]                         |
| 67  | <i>Melissoptila</i>    | 1  | 2   | [20,29,30,36]                         |
| 68  | <i>Melitoma</i>        | 3  | 3   | [19,20,22-24,26,27,29,30,32,36]       |
| 69  | <i>Mesocheira</i>      | 1  | 0   | [19,23,24]                            |
| 70  | <i>Mesoplia</i>        | 2  | 0   | [19,20,23,24]                         |
| 71  | <i>Mesoxaea</i>        | 1  | 0   | [19]                                  |
| 72  | <i>Mexalictus</i>      | 1  | 1   | [25]                                  |
| 73  | <i>Monoeca</i>         | 1  | 0   | [20,24,27]                            |
| 74  | <i>Mydrosoma</i>       | 1  | 0   | [27]                                  |
| 75  | <i>Nannotrigona</i>    | 1  | 0   | [18,20-24,26,29,32,36-41]             |
| 76  | <i>Neocorynura</i>     | 4  | 2   | [19,24,26,28]                         |
| 77  | <i>Neolarra</i>        | 1  | 0   | [19]                                  |
| 78  | <i>Nomada</i>          | 1  | 7   | [19,23,28,30]                         |
| 79  | <i>Nomia</i>           | 1  | 0   | [30]                                  |
| 80  | <i>Osiris</i>          | 1  | 0   | [21,22,32]                            |
| 81  | <i>Osmia</i>           | 4  | 2   | [19,24,25,27,28,30,33]                |
| 82  | <i>Oxytrigona</i>      | 1  | 0   | [24,29,37,43]                         |
| 83  | <i>Paragapostemon</i>  | 1  | 0   | [27,28,31]                            |
| 84  | <i>Parantidium</i>     | 2  | 3   | [19,23,25,27,28]                      |
| 85  | <i>Paratetrapedia</i>  | 7  | 8   | [18,20-24,26,27,29,30,32,36]          |
| 86  | <i>Paratrigona</i>     | 2  | 0   | [24,37]                               |
| 87  | <i>Partamona</i>       | 2  | 0   | [18,20,21,23-27,36-41]                |
| 88  | <i>Peponapis</i>       | 7  | 3   | [18-20,22-29,31,32,36]                |
| 89  | <i>Perdita</i>         | 19 | 22  | [19,27,28,30,31]                      |
| 90  | <i>Pereirapis</i>      | 1  | 0   | [20,26,29]                            |
| 91  | <i>Plebeia</i>         | 10 | 0   | [18-27,29,30,32,36,37,39-41,44]       |
| 92  | <i>Protandrena</i>     | 1  | 24  | [19,20,25-27,31]                      |
| 93  | <i>Pseudaugochlora</i> | 2  | 1   | [18-24,26,27,29,30,32,36]             |
| 94  | <i>Pseudopanurgus</i>  | 14 | 11  | [18-23,25-29,31]                      |
| 95  | <i>Ptiloglossa</i>     | 2  | 1   | [20-24,32,36]                         |
| 96  | <i>Ptilothrix</i>      | 0  | 1   | [30]                                  |
| 97  | <i>Rhathymus</i>       | 0  | 1   | [26]                                  |
| 98  | <i>Scaptotrigona</i>   | 3  | 0   | [18,20,22-24,26,27,29,32,34,36-43,45] |
| 99  | <i>Scaura</i>          | 1  | 0   | [37]                                  |
| 100 | <i>Sphecodes</i>       | 0  | 12  | [19,23,25-28,30]                      |
| 101 | <i>Sphecodosoma</i>    | 1  | 0   | [30]                                  |
| 102 | <i>Stelis</i>          | 2  | 0   | [19-21,27]                            |
| 103 | <i>Svastra</i>         | 3  | 2   | [19,21,24,28-30]                      |
| 104 | <i>Syntrichalonia</i>  | 1  | 1   | [19,24,28,30]                         |
| 105 | <i>Temnosoma</i>       | 1  | 0   | [21,22]                               |
| 106 | <i>Tetragona</i>       | 1  | 0   | [21,37]                               |
| 107 | <i>Tetragonisca</i>    | 1  | 0   | [23,24,37,43]                         |
| 108 | <i>Tetraloniella</i>   | 13 | 7   | [19,20,23,24,27-30]                   |

|     |                    |            |            |                                    |
|-----|--------------------|------------|------------|------------------------------------|
| 109 | <i>Tetrapedia</i>  | 1          | 2          | [19-21,23,24,26,27,32,36]          |
| 110 | <i>Thygater</i>    | 4          | 7          | [19,23-28,31]                      |
| 111 | <i>Trachusa</i>    | 5          | 2          | [19,23,27,28,33]                   |
| 112 | <i>Triepeolus</i>  | 8          | 16         | [19-23,26-29,32,36]                |
| 113 | <i>Trigona</i>     | 5          | 0          | [18,20-27,29,32,34,36,37,40,41,43] |
| 114 | <i>Trigonisca</i>  | 4          | 1          | [19-21,23,24,32,37-41]             |
| 115 | <i>Xenoglossa</i>  | 2          | 1          | [23,24,27,30,31]                   |
| 116 | <i>Xeromelecta</i> | 1          | 0          | [28,30]                            |
| 117 | <i>Xylocopa</i>    | 16         | 3          | [18-29,32,33,36,46]                |
| 118 | <i>Zikanapis</i>   | 1          | 0          | [27]                               |
|     |                    | <b>502</b> | <b>850</b> |                                    |

---

\*Species not reviewed or reported as unidentified.
